# Supplementary material for: Getting the leaves right matters for estimating temperature extremes
Source: Copernicus journal article supplement (doi:10.5194/gmd-16-7357-2023), 2023-12-19
Supplement: Supplementary file 1 [file gmd-16-7357-2023-supplement.pdf]

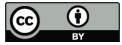

*Supplement of*

## **Getting the leaves right matters for estimating temperature extremes**

**Gregory Duveiller et al.**

*Correspondence to:* Gregory Duveiller ([gduveiller@bgc-jena.mpg.de](mailto:gduveiller@bgc-jena.mpg.de))

The copyright of individual parts of the supplement might differ from the article licence.

### Hysteresis patterns of biases between observational sources and variables in ERA5

Analysed in a climate space defined by bins of mean annual 2m temperature (horizontally) and mean soil moisture (vertically)

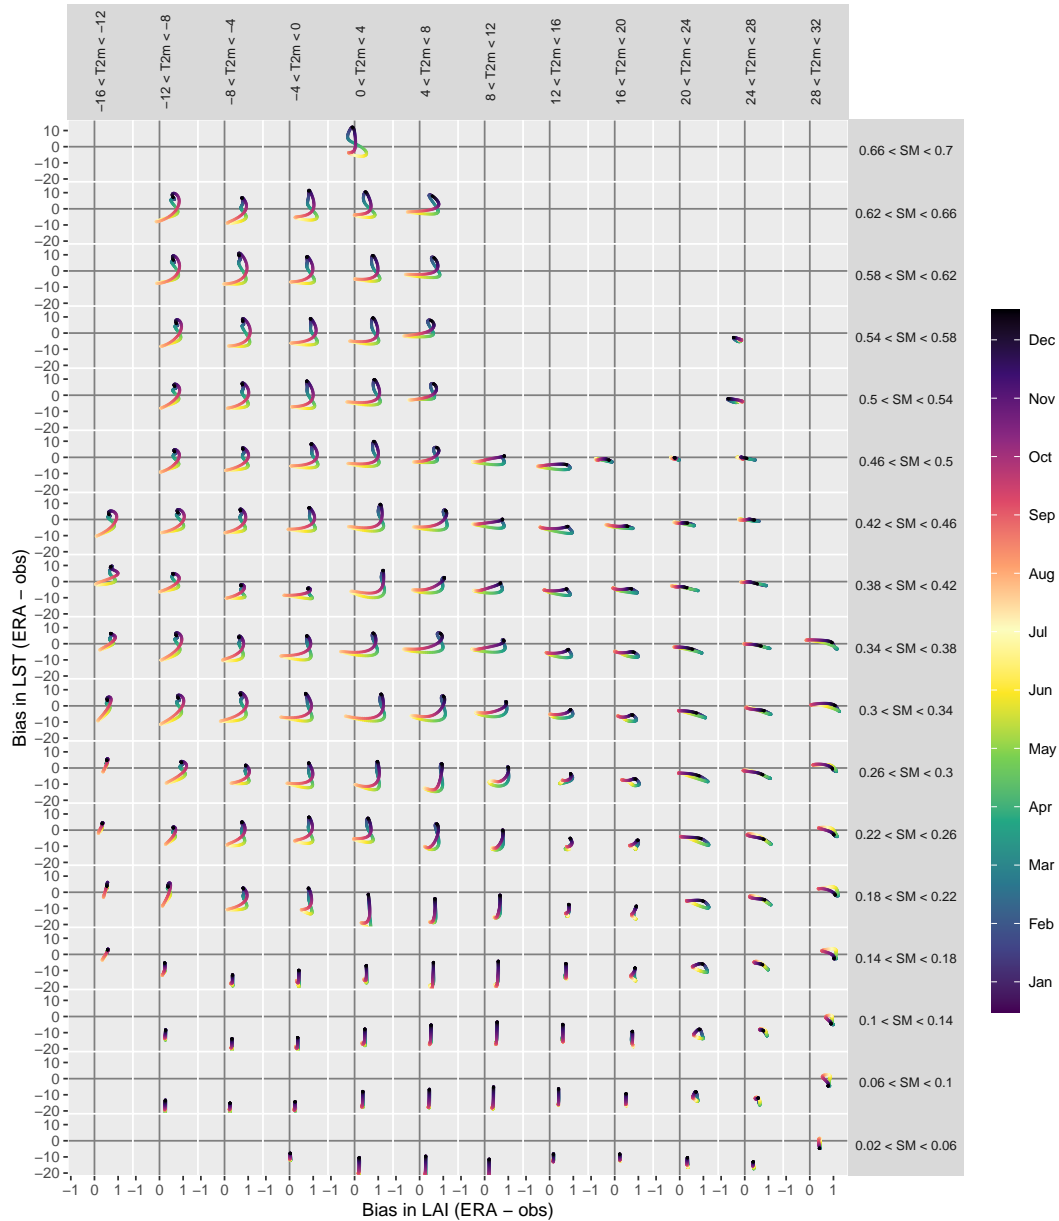

**Figure S1.** Hysteretic behaviour between the biases in LAI and the biases in LST for a range of climate zones defined by classes of annual mean 2m temperatures (T2m) and soil moisture (SM). The biases are always defined as ERA5L variables minus the values from reference observational datasets. Only interpolated curves are shown for clarity purposes.
